# Supplementary material for: A Retrospective Analysis of Feeding Practices and Complications in Patients with Critical Bronchiolitis on Non-Invasive Respiratory Support
Source: MDPI journal article supplement (doi:10.3390/children8050410), 2021-05-18
Supplement: s1 [file s1]

**A**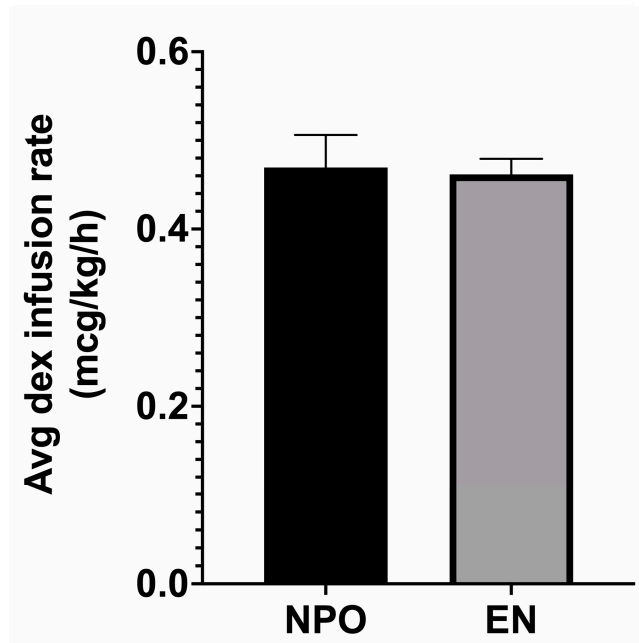

| Dexmedetomidine | NPO | EN |
|-----------------|-----|----|
| Prescribed      | 28  | 62 |
| Not prescribed  | 29  | 49 |

**B**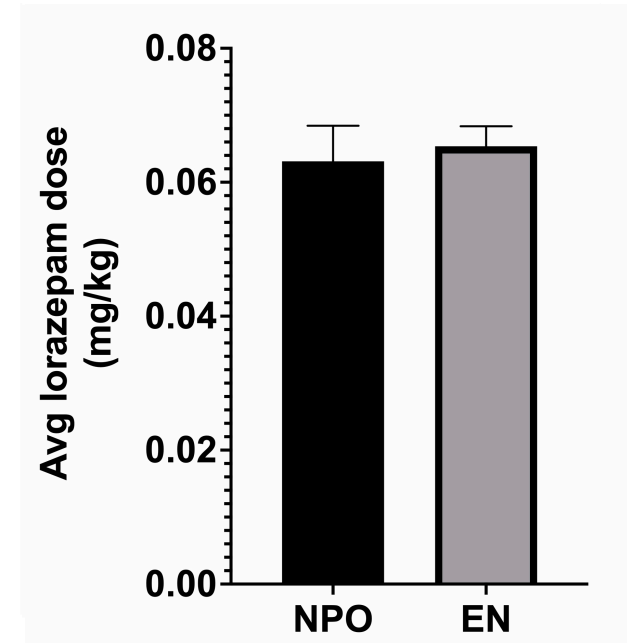

| Lorazepam      | NPO | EN |
|----------------|-----|----|
| Prescribed     | 20  | 51 |
| Not prescribed | 37  | 60 |

**Figure S1.** Sedation data for the NPO and EN groups with respect to average doses of **(A)** dexmedetomidine and **(B)** lorazepam being administered to critically ill pediatric patients included in the study. Dexmedetomidine usage in NPO group was 51% and in the PO group was 57%. Lorazepam usage in NPO group was 36% and in PO group was 47%. Data presented as mean  $\pm$  standard error of mean. Avg = average, dex = dexmedetomidine, NPO = nil per os (nothing by mouth), EN = enteral nutrition

**Table S1. Demographic and Clinical Differences Between Groups (intubated only, *n* = 14)**

|                                                       | NPO<br>( <i>n</i> = 9) | EN<br>( <i>n</i> = 5) | <i>p</i>     |
|-------------------------------------------------------|------------------------|-----------------------|--------------|
| Weight (kg), median (IQR)                             | 7.7 (4.7-9.3)          | 5 (4.2-6)             | 0.15         |
| Age (months), median (IQR)                            | 6 (2.5-14)             | 3 (2-5)               | 0.25         |
| PICU LOS (days), median (IQR)                         | 11 (6-32.5)            | 15 (12.5-25.5)        | 0.38         |
| NRS duration prior to intubation (days), median (IQR) | 1.5 (1.1-2.3)          | 2.5 (1.9-4.5)         | <b>0.044</b> |
| Intubation (hours after admission), median (IQR)      | 34 (28-68.5)           | 58 (42-130)           | 0.15         |
| Intubation duration (days), median (IQR)              | 8 (3.5-22)             | 12 (4.5-15.5)         | 0.89         |
| Pathogen (#), median (IQR)                            | 3 (2-3.5)              | 3 (2-4)               | 0.83         |
| Pathogen positive, <i>n</i> (%)                       | 9 (100)                | 5 (100)               | 1.0          |
| Single                                                | 1 (11)                 | 0 (0)                 | 0.44         |
| Multiple                                              | 8 (89)                 | 5 (100)               |              |
| Virus only                                            | 5 (55)                 | 0 (0)                 | <b>0.038</b> |
| Virus + Bacteria                                      | 4 (45)                 | 5 (100)               |              |
| Extubation failure, <i>n</i> (%)                      | 1 (11)                 | 1 (20)                | 0.65         |
| Ventilator-free-days, median (IQR)                    | 20 (6.5-24.5)          | 16 (12.5-23.5)        | 0.89         |
| PRISM-III ROM, % (IQR)                                | 0.8 (0.5-1.1)          | 0.5 (0.2-0.5)         | 0.09         |

IQR = interquartile range, PICU LOS = pediatric intensive care unit length of stay, NRS = non-invasive respiratory support, PRISM-III ROM = risk of mortality based on Pediatric Risk of Mortality-III score.

Wilcoxon rank-sum test used to compare continuous variables presented as median (interquartile range).

Chi-square test of independence used to compare categorical variables presented as *n* (%)

**Table S2. Infecting Pathogen Characteristics (all groups,  $n = 178$ )**

| Pathogen Type               | NPO<br>( <i>n</i> = 64) | EN<br>( <i>n</i> = 114) | <i>p</i> <sup>*</sup> |
|-----------------------------|-------------------------|-------------------------|-----------------------|
| Viral, <i>n</i> (%)         |                         |                         |                       |
| Respiratory syncytial virus | 35 (61)                 | 71 (68)                 | 0.12                  |
| Rhino/enterovirus           | 25 (44)                 | 30 (29)                 |                       |
| Adenovirus                  | 1 (2)                   | 6 (6)                   |                       |
| Coronavirus                 | 7 (12)                  | 4 (4)                   |                       |
| Parainfluenza               | 4 (7)                   | 6 (6)                   |                       |
| Human metapneumovirus       | 2 (4)                   | 10 (10)                 |                       |
| Influenza A                 | 0 (0)                   | 1 (1)                   |                       |
| Bacterial, <i>n</i> (%)     |                         |                         |                       |
| Streptococcus pneumoniae    | 2 (4)                   | 2 (2)                   | 0.51                  |
| Staphylococcus aureus       | 1 (2)                   | 1 (1)                   |                       |
| Mycoplasma pneumoniae       | 0 (0)                   | 1 (1)                   |                       |
| Moraxella catarrhalis       | 2 (4)                   | 3 (3)                   |                       |
| Pseudomonas aeruginosa      | 1 (2)                   | 0 (0)                   |                       |
| Hemophilus influenzae       | 5 (9)                   | 2 (2)                   |                       |
| Presumed                    | 7 (12)                  | 14 (13)                 |                       |

\* Chi-square test of independence used to compare categorical variables presented as  $n$  (%)

**Table S3. Feeding Complications Encountered During Feeding Initiation (EN group only, *n* = 9)**

| List of Complications                                                                                                 |
|-----------------------------------------------------------------------------------------------------------------------|
| 1. Documented formula found in nose and mouth with bradycardia and desaturation requiring bagging.                    |
| 2. Concern for respiratory status; apnea/bradycardia spells.                                                          |
| 3. Emesis x2 afternoon prior to intubation; however, no reported aspiration.                                          |
| 4. Feeds stopped after 23 hours due to increased WOB, then restarted and increased slowly, reached goal while on HHF. |
| 5. Feeds discontinued due to increased WOB and need for BiPAP.                                                        |
| 6. NG feeds stopped due to increased WOB; restarted when clinically improved.                                         |
| 7. NG feeds started 4 hours after RAM but stopped due to increased WOB; reached full feeds once on HHF.               |
| 8. Patient did not tolerate bolus feeds, with multiple episodes of emesis, abdominal distention and hematemesis.      |
| 9. NG feeds started then paused due to increased WOB, then restarted and tolerated well.                              |

WOB = work of breathing, HHF = heated high flow, BiPAP = bilevel positive airway pressure, NG = nasogastric
